# Supplementary material for: Dipole tuning of charge transport in molecular junctions
Source: Royal Society of Chemistry journal article supplement (doi:10.1039/b915634h), 2010-01-01

## Supporting Information

### Dipole Tuning of Charge Transport in Molecular Junctions

Rupa K. Hiremath, Mohammad Hussain K. Rabinal\* and Basavaraj G. Mulimani

*Departments of Physics, Karnatak University, Dharwad 580003, India*

**\*e-mail - mkrabinal@yahoo.com**

Highly doped ( $p^+$ ) Si surfaces were modified with molecules belonging to ethynylbenzene series. The molecules are attached covalently to the silicon surface by thermo-chemical reaction. X-ray photoelectron spectroscopic measurements are done for the modified surfaces using ESCLAB spectrometer at a take-off angle  $35^\circ$  and pressure of  $10^{-11}$  torr. The spectra for  $p^+$ -Si surfaces modified with EBZ and DEBZ molecules are shown below. It showed Si (2p) peak at 99.8 eV and C-peak around 285 eV indicating molecular bonding to Si surface. There was no presence of oxygen or any other contamination.

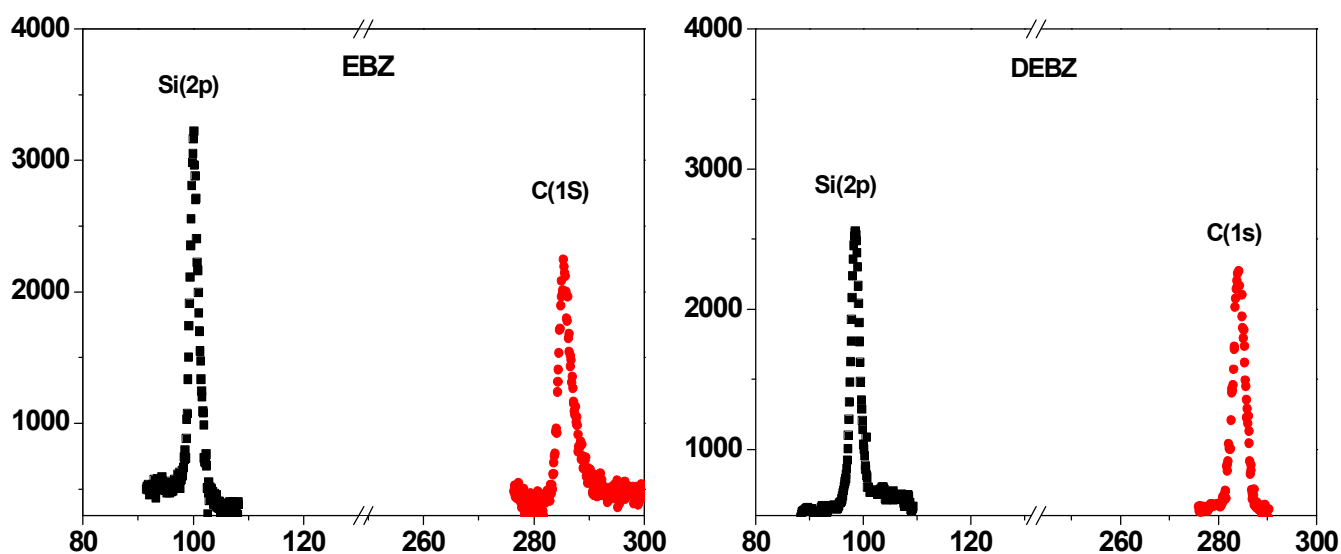

Supplement: b915634h.pdf [file b915634h.pdf]
